# Supplementary material for: Vitamin D3 ameliorates R-loop-induced replication stress and chromosomal instability in MED12-mutant uterine fibroids
Source: Research Square preprint supplement (doi:10.21203/rs.3.rs-8031602/v1), 2026-01-13
Supplement: Supplementary file 1 [file 14f5bc83a3cf10a57d6977aa.xlsx]

## Sheet: Sheet1
NAME	GS.br..follow.link.to.MSigDB	GS.DETAILS	SIZE	ES	NES	NOM.p.val	FDR.q.val	FWER.p.val	RANK.AT.MAX	LEADING.EDGE	X
REACTOME_EUKARYOTIC_TRANSLATION_ELONGATION	REACTOME_EUKARYOTIC_TRANSLATION_ELONGATION	Details ...	94	-0.909337	-2.71043	0	0	0	1338	tags=84%, list=4%, signal=87%
REACTOME_SRP_DEPENDENT_COTRANSLATIONAL_PROTEIN_TARGETING_TO_MEMBRANE	REACTOME_SRP_DEPENDENT_COTRANSLATIONAL_PROTEIN_TARGETING_TO_MEMBRANE	Details ...	113	-0.87449	-2.69687	0	0	0	1984	tags=77%, list=6%, signal=81%
REACTOME_EUKARYOTIC_TRANSLATION_INITIATION	REACTOME_EUKARYOTIC_TRANSLATION_INITIATION	Details ...	120	-0.8538	-2.63424	0	0	0	2735	tags=76%, list=8%, signal=82%
REACTOME_RESPONSE_OF_EIF2AK4_GCN2_TO_AMINO_ACID_DEFICIENCY	REACTOME_RESPONSE_OF_EIF2AK4_GCN2_TO_AMINO_ACID_DEFICIENCY	Details ...	102	-0.881204	-2.63143	0	0	0	1338	tags=75%, list=4%, signal=78%
REACTOME_SELENOAMINO_ACID_METABOLISM	REACTOME_SELENOAMINO_ACID_METABOLISM	Details ...	118	-0.850342	-2.59252	0	0	0	1922	tags=69%, list=5%, signal=72%
REACTOME_NONSENSE_MEDIATED_DECAY_NMD	REACTOME_NONSENSE_MEDIATED_DECAY_NMD	Details ...	116	-0.827453	-2.53082	0	0	0	1338	tags=67%, list=4%, signal=70%
REACTOME_TRANSLATION	REACTOME_TRANSLATION	Details ...	293	-0.748355	-2.52431	0	0	0	4918	tags=65%, list=14%, signal=75%
REACTOME_REGULATION_OF_EXPRESSION_OF_SLITS_AND_ROBOS	REACTOME_REGULATION_OF_EXPRESSION_OF_SLITS_AND_ROBOS	Details ...	159	-0.784783	-2.50096	0	0	0	3013	tags=63%, list=8%, signal=68%
REACTOME_CELLULAR_RESPONSE_TO_STARVATION	REACTOME_CELLULAR_RESPONSE_TO_STARVATION	Details ...	157	-0.773007	-2.47336	0	0	0	3820	tags=66%, list=11%, signal=73%
REACTOME_RRNA_PROCESSING	REACTOME_RRNA_PROCESSING	Details ...	203	-0.741198	-2.43625	0	0	0	3989	tags=60%, list=11%, signal=67%
REACTOME_INFLUENZA_INFECTION	REACTOME_INFLUENZA_INFECTION	Details ...	157	-0.758248	-2.42498	0	0	0	2945	tags=61%, list=8%, signal=66%
REACTOME_SARS_COV_2_MODULATES_HOST_TRANSLATION_MACHINERY	REACTOME_SARS_COV_2_MODULATES_HOST_TRANSLATION_MACHINERY	Details ...	50	-0.888611	-2.37676	0	0	0	1922	tags=78%, list=5%, signal=82%
REACTOME_SARS_COV_1_MODULATES_HOST_TRANSLATION_MACHINERY	REACTOME_SARS_COV_1_MODULATES_HOST_TRANSLATION_MACHINERY	Details ...	37	-0.918566	-2.36285	0	0	0	1922	tags=86%, list=5%, signal=91%
REACTOME_RESPIRATORY_ELECTRON_TRANSPORT	REACTOME_RESPIRATORY_ELECTRON_TRANSPORT	Details ...	159	-0.740731	-2.3605	0	0	0	5064	tags=65%, list=14%, signal=76%
REACTOME_ACTIVATION_OF_THE_MRNA_UPON_BINDING_OF_THE_CAP_BINDING_COMPLEX_AND_EIFS_AND_SUBSEQUENT_BINDING_TO_43S	REACTOME_ACTIVATION_OF_THE_MRNA_UPON_BINDING_OF_THE_CAP_BINDING_COMPLEX_AND_EIFS_AND_SUBSEQUENT_BINDING_TO_43S	Details ...	60	-0.830214	-2.32509	0	0	0	2443	tags=67%, list=7%, signal=71%
REACTOME_SIGNALING_BY_ROBO_RECEPTORS	REACTOME_SIGNALING_BY_ROBO_RECEPTORS	Details ...	205	-0.686165	-2.24405	0	0	0	3072	tags=49%, list=9%, signal=54%
REACTOME_AEROBIC_RESPIRATION_AND_RESPIRATORY_ELECTRON_TRANSPORT	REACTOME_AEROBIC_RESPIRATION_AND_RESPIRATORY_ELECTRON_TRANSPORT	Details ...	261	-0.670785	-2.23988	0	0	0	5453	tags=57%, list=15%, signal=67%
REACTOME_COMPLEX_I_BIOGENESIS	REACTOME_COMPLEX_I_BIOGENESIS	Details ...	68	-0.785224	-2.22275	0	0	0	3882	tags=65%, list=11%, signal=72%
REACTOME_MITOCHONDRIAL_TRANSLATION	REACTOME_MITOCHONDRIAL_TRANSLATION	Details ...	94	-0.735958	-2.18844	0	0	0	5516	tags=71%, list=15%, signal=84%
REACTOME_SCAVENGING_OF_HEME_FROM_PLASMA	REACTOME_SCAVENGING_OF_HEME_FROM_PLASMA	Details ...	68	-0.726968	-2.04007	0	3.87944e-05	0.001	7099	tags=46%, list=20%, signal=57%
REACTOME_METABOLISM_OF_AMINO_ACIDS_AND_DERIVATIVES	REACTOME_METABOLISM_OF_AMINO_ACIDS_AND_DERIVATIVES		351	-0.59461	-2.03141	0	3.69471e-05	0.001	3479	tags=39%, list=10%, signal=43%
REACTOME_CD22_MEDIATED_BCR_REGULATION	REACTOME_CD22_MEDIATED_BCR_REGULATION		60	-0.718708	-2.00238	0	7.14296e-05	0.002	7099	tags=40%, list=20%, signal=50%
REACTOME_COMPLEX_IV_ASSEMBLY	REACTOME_COMPLEX_IV_ASSEMBLY		48	-0.743871	-2.00145	0	6.8324e-05	0.002	4503	tags=67%, list=13%, signal=76%
REACTOME_INITIAL_TRIGGERING_OF_COMPLEMENT	REACTOME_INITIAL_TRIGGERING_OF_COMPLEMENT		78	-0.672978	-1.95122	0	0.00039038	0.012	5997	tags=44%, list=17%, signal=52%
REACTOME_CRISTAE_FORMATION	REACTOME_CRISTAE_FORMATION		33	-0.761878	-1.92142	0	0.000819599	0.026	2089	tags=55%, list=6%, signal=58%
REACTOME_IMMUNOREGULATORY_INTERACTIONS_BETWEEN_A_LYMPHOID_AND_A_NON_LYMPHOID_CELL	REACTOME_IMMUNOREGULATORY_INTERACTIONS_BETWEEN_A_LYMPHOID_AND_A_NON_LYMPHOID_CELL		186	-0.592619	-1.91915	0	0.000818969	0.027	8320	tags=51%, list=23%, signal=66%
REACTOME_MITOCHONDRIAL_PROTEIN_IMPORT	REACTOME_MITOCHONDRIAL_PROTEIN_IMPORT		65	-0.673497	-1.91552	0	0.000874765	0.03	6266	tags=62%, list=18%, signal=75%
REACTOME_FORMATION_OF_ATP_BY_CHEMIOSMOTIC_COUPLING	REACTOME_FORMATION_OF_ATP_BY_CHEMIOSMOTIC_COUPLING		20	-0.851081	-1.89983	0	0.00112524	0.04	2089	tags=75%, list=6%, signal=80%
REACTOME_SARS_COV_1_HOST_INTERACTIONS	REACTOME_SARS_COV_1_HOST_INTERACTIONS		98	-0.62934	-1.88354	0	0.00135464	0.049	2185	tags=42%, list=6%, signal=44%
REACTOME_CREATION_OF_C4_AND_C2_ACTIVATORS	REACTOME_CREATION_OF_C4_AND_C2_ACTIVATORS		70	-0.657104	-1.86871	0	0.00184223	0.067	5997	tags=39%, list=17%, signal=46%
REACTOME_FCGR_ACTIVATION	REACTOME_FCGR_ACTIVATION		68	-0.665352	-1.86169	0	0.00185997	0.07	7301	tags=47%, list=21%, signal=59%
REACTOME_ACTIVATION_OF_APC_C_AND_APC_C_CDC20_MEDIATED_DEGRADATION_OF_MITOTIC_PROTEINS	REACTOME_ACTIVATION_OF_APC_C_AND_APC_C_CDC20_MEDIATED_DEGRADATION_OF_MITOTIC_PROTEINS		64	-0.633623	-1.80954	0	0.00515346	0.188	7556	tags=69%, list=21%, signal=87%
REACTOME_MRNA_SPLICING	REACTOME_MRNA_SPLICING		212	-0.552402	-1.80625	0	0.00533528	0.199	8335	tags=57%, list=23%, signal=74%
REACTOME_PROTEIN_LOCALIZATION	REACTOME_PROTEIN_LOCALIZATION		164	-0.5671	-1.80459	0	0.00531847	0.203	8234	tags=59%, list=23%, signal=77%
REACTOME_COMPLEX_III_ASSEMBLY	REACTOME_COMPLEX_III_ASSEMBLY		26	-0.752149	-1.79548	0	0.00611208	0.235	3078	tags=65%, list=9%, signal=72%
REACTOME_FORMATION_OF_TC_NER_PRE_INCISION_COMPLEX	REACTOME_FORMATION_OF_TC_NER_PRE_INCISION_COMPLEX		51	-0.657722	-1.77553	0	0.00782113	0.294	6492	tags=53%, list=18%, signal=65%
REACTOME_ANTIGEN_PROCESSING_UB_ATP_INDEPENDENT_PROTEASOMAL_DEGRADATION	REACTOME_ANTIGEN_PROCESSING_UB_ATP_INDEPENDENT_PROTEASOMAL_DEGRADATION		19	-0.777298	-1.75318	0.00383142	0.0108781	0.404	7537	tags=89%, list=21%, signal=113%
REACTOME_CROSS_PRESENTATION_OF_SOLUBLE_EXOGENOUS_ANTIGENS_ENDOSOMES	REACTOME_CROSS_PRESENTATION_OF_SOLUBLE_EXOGENOUS_ANTIGENS_ENDOSOMES		42	-0.663128	-1.73737	0	0.0136592	0.482	7558	tags=74%, list=21%, signal=94%
REACTOME_SWITCHING_OF_ORIGINS_TO_A_POST_REPLICATIVE_STATE	REACTOME_SWITCHING_OF_ORIGINS_TO_A_POST_REPLICATIVE_STATE		79	-0.58656	-1.72971	0	0.0147462	0.517	7580	tags=61%, list=21%, signal=77%
REACTOME_MRNA_SPLICING_MINOR_PATHWAY	REACTOME_MRNA_SPLICING_MINOR_PATHWAY		50	-0.632394	-1.72509	0	0.0153272	0.536	4073	tags=44%, list=11%, signal=50%
REACTOME_PROTEASOME_ASSEMBLY	REACTOME_PROTEASOME_ASSEMBLY		52	-0.627489	-1.7199	0	0.0162316	0.569	7803	tags=69%, list=22%, signal=89%
REACTOME_COMPLEMENT_CASCADE	REACTOME_COMPLEMENT_CASCADE		113	-0.55981	-1.71961	0	0.0158831	0.57	5997	tags=35%, list=17%, signal=42%
REACTOME_TRANSCRIPTION_COUPLED_NUCLEOTIDE_EXCISION_REPAIR_TC_NER	REACTOME_TRANSCRIPTION_COUPLED_NUCLEOTIDE_EXCISION_REPAIR_TC_NER		76	-0.581605	-1.70527	0	0.0187147	0.642	8798	tags=62%, list=25%, signal=82%
REACTOME_DUAL_INCISION_IN_TC_NER	REACTOME_DUAL_INCISION_IN_TC_NER		63	-0.600918	-1.70343	0	0.0188485	0.649	6492	tags=49%, list=18%, signal=60%
REACTOME_CDK_MEDIATED_PHOSPHORYLATION_AND_REMOVAL_OF_CDC6	REACTOME_CDK_MEDIATED_PHOSPHORYLATION_AND_REMOVAL_OF_CDC6		60	-0.601958	-1.68778	0	0.0231023	0.729	7556	tags=63%, list=21%, signal=80%
REACTOME_SYNTHESIS_OF_DNA	REACTOME_SYNTHESIS_OF_DNA		108	-0.559235	-1.68707	0	0.0227707	0.731	7580	tags=55%, list=21%, signal=69%
REACTOME_ORC1_REMOVAL_FROM_CHROMATIN	REACTOME_ORC1_REMOVAL_FROM_CHROMATIN		58	-0.612275	-1.68514	0.00345423	0.0227774	0.735	7580	tags=64%, list=21%, signal=81%
REACTOME_VIF_MEDIATED_DEGRADATION_OF_APOBEC3G	REACTOME_VIF_MEDIATED_DEGRADATION_OF_APOBEC3G		41	-0.63751	-1.67724	0.00181488	0.0250085	0.766	7556	tags=68%, list=21%, signal=87%
REACTOME_APC_C_MEDIATED_DEGRADATION_OF_CELL_CYCLE_PROTEINS	REACTOME_APC_C_MEDIATED_DEGRADATION_OF_CELL_CYCLE_PROTEINS		75	-0.577615	-1.67653	0	0.0248042	0.772	7779	tags=64%, list=22%, signal=82%
REACTOME_PROCESSING_OF_CAPPED_INTRON_CONTAINING_PRE_MRNA	REACTOME_PROCESSING_OF_CAPPED_INTRON_CONTAINING_PRE_MRNA		283	-0.49469	-1.66923	0	0.0268846	0.82	6532	tags=43%, list=18%, signal=53%
REACTOME_HH_MUTANTS_ABROGATE_LIGAND_SECRETION	REACTOME_HH_MUTANTS_ABROGATE_LIGAND_SECRETION		46	-0.608	-1.65264	0.0017762	0.0326568	0.878	7556	tags=61%, list=21%, signal=77%
REACTOME_SARS_COV_1_INFECTION	REACTOME_SARS_COV_1_INFECTION		143	-0.520259	-1.64676	0	0.0343686	0.899	3800	tags=38%, list=11%, signal=42%
REACTOME_ANTIGEN_PROCESSING_CROSS_PRESENTATION	REACTOME_ANTIGEN_PROCESSING_CROSS_PRESENTATION		98	-0.545676	-1.64315	0	0.0352127	0.904	7558	tags=53%, list=21%, signal=67%
REACTOME_MITOCHONDRIAL_PROTEIN_DEGRADATION	REACTOME_MITOCHONDRIAL_PROTEIN_DEGRADATION		98	-0.550607	-1.64176	0.00510204	0.0351909	0.907	6592	tags=48%, list=19%, signal=59%
REACTOME_DNA_REPLICATION_PRE_INITIATION	REACTOME_DNA_REPLICATION_PRE_INITIATION		149	-0.517511	-1.6355	0	0.0375021	0.928	7580	tags=52%, list=21%, signal=65%
REACTOME_MITOCHONDRIAL_FATTY_ACID_BETA_OXIDATION	REACTOME_MITOCHONDRIAL_FATTY_ACID_BETA_OXIDATION		37	-0.636697	-1.63056	0	0.0389019	0.936	8433	tags=70%, list=24%, signal=92%
REACTOME_FCERI_MEDIATED_NF_KB_ACTIVATION	REACTOME_FCERI_MEDIATED_NF_KB_ACTIVATION		122	-0.527834	-1.62841	0	0.0394439	0.945	7556	tags=42%, list=21%, signal=53%
REACTOME_REGULATION_OF_TLR_BY_ENDOGENOUS_LIGAND	REACTOME_REGULATION_OF_TLR_BY_ENDOGENOUS_LIGAND		22	-0.684058	-1.62302	0.0131827	0.0409702	0.956	6318	tags=55%, list=18%, signal=66%
REACTOME_PROTEIN_HYDROXYLATION	REACTOME_PROTEIN_HYDROXYLATION		20	-0.714594	-1.61905	0.0116279	0.0421411	0.965	3218	tags=40%, list=9%, signal=44%
REACTOME_BINDING_AND_UPTAKE_OF_LIGANDS_BY_SCAVENGER_RECEPTORS	REACTOME_BINDING_AND_UPTAKE_OF_LIGANDS_BY_SCAVENGER_RECEPTORS		97	-0.533659	-1.60415	0.0036036	0.049132	0.979	7099	tags=41%, list=20%, signal=51%
REACTOME_SARS_COV_2_HOST_INTERACTIONS	REACTOME_SARS_COV_2_HOST_INTERACTIONS		203	-0.483938	-1.59294	0	0.0549184	0.987	2327	tags=28%, list=7%, signal=29%
REACTOME_APC_C_CDH1_MEDIATED_DEGRADATION_OF_CDC20_AND_OTHER_APC_C_CDH1_TARGETED_PROTEINS_IN_LATE_MITOSIS_EARLY_G1	REACTOME_APC_C_CDH1_MEDIATED_DEGRADATION_OF_CDC20_AND_OTHER_APC_C_CDH1_TARGETED_PROTEINS_IN_LATE_MITOSIS_EARLY_G1		61	-0.564963	-1.58727	0.00343643	0.0573645	0.988	7779	tags=62%, list=22%, signal=80%
REACTOME_TRNA_PROCESSING	REACTOME_TRNA_PROCESSING		110	-0.514066	-1.58221	0.00353357	0.0596025	0.989	4285	tags=40%, list=12%, signal=45%
REACTOME_DNA_REPLICATION	REACTOME_DNA_REPLICATION		184	-0.49225	-1.58051	0	0.0597756	0.99	7580	tags=49%, list=21%, signal=62%
REACTOME_GLUTATHIONE_CONJUGATION	REACTOME_GLUTATHIONE_CONJUGATION		35	-0.615234	-1.57627	0.00176367	0.0611817	0.993	4106	tags=51%, list=12%, signal=58%
REACTOME_STABILIZATION_OF_P53	REACTOME_STABILIZATION_OF_P53		44	-0.600888	-1.57538	0.00894454	0.060881	0.993	7556	tags=64%, list=21%, signal=81%
REACTOME_MATURATION_OF_TCA_ENZYMES_AND_REGULATION_OF_TCA_CYCLE	REACTOME_MATURATION_OF_TCA_ENZYMES_AND_REGULATION_OF_TCA_CYCLE		20	-0.691298	-1.57535	0.0168856	0.0599844	0.993	4810	tags=65%, list=14%, signal=75%
REACTOME_RUNX1_REGULATES_TRANSCRIPTION_OF_GENES_INVOLVED_IN_DIFFERENTIATION_OF_HSCS	REACTOME_RUNX1_REGULATES_TRANSCRIPTION_OF_GENES_INVOLVED_IN_DIFFERENTIATION_OF_HSCS		116	-0.510918	-1.57479	0	0.0595489	0.993	7877	tags=52%, list=22%, signal=66%
REACTOME_ROLE_OF_PHOSPHOLIPIDS_IN_PHAGOCYTOSIS	REACTOME_ROLE_OF_PHOSPHOLIPIDS_IN_PHAGOCYTOSIS		81	-0.536417	-1.56958	0	0.061882	0.996	7268	tags=41%, list=20%, signal=51%
REACTOME_DEFECTIVE_CFTR_CAUSES_CYSTIC_FIBROSIS	REACTOME_DEFECTIVE_CFTR_CAUSES_CYSTIC_FIBROSIS		48	-0.584927	-1.56919	0.00389864	0.0612149	0.996	7556	tags=63%, list=21%, signal=79%
REACTOME_RNA_POLYMERASE_I_PROMOTER_ESCAPE	REACTOME_RNA_POLYMERASE_I_PROMOTER_ESCAPE		90	-0.52565	-1.56916	0	0.0603637	0.996	7835	tags=51%, list=22%, signal=65%
REACTOME_SCF_BETA_TRCP_MEDIATED_DEGRADATION_OF_EMI1	REACTOME_SCF_BETA_TRCP_MEDIATED_DEGRADATION_OF_EMI1		42	-0.60083	-1.56499	0.00912409	0.0624044	0.996	7556	tags=64%, list=21%, signal=82%
REACTOME_TRANSFERRIN_ENDOCYTOSIS_AND_RECYCLING	REACTOME_TRANSFERRIN_ENDOCYTOSIS_AND_RECYCLING		31	-0.627708	-1.56345	0.0175439	0.0624514	0.996	5289	tags=48%, list=15%, signal=57%
REACTOME_RRNA_MODIFICATION_IN_THE_NUCLEUS_AND_CYTOSOL	REACTOME_RRNA_MODIFICATION_IN_THE_NUCLEUS_AND_CYTOSOL		60	-0.562987	-1.56278	0.00722022	0.0620868	0.996	4191	tags=40%, list=12%, signal=45%
REACTOME_RNA_POLYMERASE_I_TRANSCRIPTION_TERMINATION	REACTOME_RNA_POLYMERASE_I_TRANSCRIPTION_TERMINATION		31	-0.625101	-1.55302	0.00738007	0.0678519	0.999	7732	tags=61%, list=22%, signal=78%
REACTOME_AUF1_HNRNP_D0_BINDS_AND_DESTABILIZES_MRNA	REACTOME_AUF1_HNRNP_D0_BINDS_AND_DESTABILIZES_MRNA		42	-0.586489	-1.55095	0.018315	0.0686122	0.999	7556	tags=62%, list=21%, signal=78%
REACTOME_METABOLISM_OF_POLYAMINES	REACTOME_METABOLISM_OF_POLYAMINES		46	-0.577282	-1.55009	0.0106007	0.0683525	0.999	8258	tags=61%, list=23%, signal=79%
REACTOME_REGULATION_OF_APOPTOSIS	REACTOME_REGULATION_OF_APOPTOSIS		40	-0.59167	-1.54915	0.0126354	0.0679814	0.999	7556	tags=65%, list=21%, signal=82%
REACTOME_REGULATION_OF_ORNITHINE_DECARBOXYLASE_ODC	REACTOME_REGULATION_OF_ORNITHINE_DECARBOXYLASE_ODC		38	-0.59845	-1.54759	0.00912409	0.0682165	0.999	7556	tags=63%, list=21%, signal=80%
REACTOME_CHROMOSOME_MAINTENANCE	REACTOME_CHROMOSOME_MAINTENANCE		139	-0.49508	-1.54666	0	0.0679589	0.999	7851	tags=46%, list=22%, signal=59%
REACTOME_CO_INHIBITION_BY_PD_1	REACTOME_CO_INHIBITION_BY_PD_1		25	-0.6478	-1.5465	0.0214669	0.067217	0.999	6773	tags=60%, list=19%, signal=74%
REACTOME_FORMATION_OF_INCISION_COMPLEX_IN_GG_NER	REACTOME_FORMATION_OF_INCISION_COMPLEX_IN_GG_NER		43	-0.584588	-1.54432	0.00915751	0.0677228	0.999	5647	tags=49%, list=16%, signal=58%
REACTOME_HEDGEHOG_LIGAND_BIOGENESIS	REACTOME_HEDGEHOG_LIGAND_BIOGENESIS		52	-0.564638	-1.5443	0.00702988	0.0669265	0.999	6794	tags=54%, list=19%, signal=66%
REACTOME_NEGATIVE_REGULATION_OF_NOTCH4_SIGNALING	REACTOME_NEGATIVE_REGULATION_OF_NOTCH4_SIGNALING		44	-0.591294	-1.5417	0.0188324	0.0678045	0.999	7620	tags=61%, list=21%, signal=78%
REACTOME_ABC_TRANSPORTER_DISORDERS	REACTOME_ABC_TRANSPORTER_DISORDERS		65	-0.55128	-1.53971	0.00874126	0.0681826	0.999	7556	tags=60%, list=21%, signal=76%
REACTOME_TRNA_MODIFICATION_IN_THE_NUCLEUS_AND_CYTOSOL	REACTOME_TRNA_MODIFICATION_IN_THE_NUCLEUS_AND_CYTOSOL		44	-0.577506	-1.53441	0.00584795	0.0711583	0.999	4928	tags=48%, list=14%, signal=55%
REACTOME_ROS_AND_RNS_PRODUCTION_IN_PHAGOCYTES	REACTOME_ROS_AND_RNS_PRODUCTION_IN_PHAGOCYTES		36	-0.605919	-1.52673	0.0201465	0.0763457	0.999	5718	tags=53%, list=16%, signal=63%
REACTOME_G1_S_DNA_DAMAGE_CHECKPOINTS	REACTOME_G1_S_DNA_DAMAGE_CHECKPOINTS		55	-0.56016	-1.5254	0.00853242	0.0764356	0.999	7556	tags=60%, list=21%, signal=76%
REACTOME_SCF_SKP2_MEDIATED_DEGRADATION_OF_P27_P21	REACTOME_SCF_SKP2_MEDIATED_DEGRADATION_OF_P27_P21		50	-0.573342	-1.52403	0.0165441	0.0764014	0.999	7556	tags=62%, list=21%, signal=79%
REACTOME_FORMATION_OF_THE_EARLY_ELONGATION_COMPLEX	REACTOME_FORMATION_OF_THE_EARLY_ELONGATION_COMPLEX		33	-0.606365	-1.52279	0.0304114	0.076504	0.999	5898	tags=45%, list=17%, signal=54%
REACTOME_PROTEIN_METHYLATION	REACTOME_PROTEIN_METHYLATION		17	-0.706131	-1.51476	0.0247148	0.0814466	1	6990	tags=76%, list=20%, signal=95%
REACTOME_FBXL7_DOWN_REGULATES_AURKA_DURING_MITOTIC_ENTRY_AND_IN_EARLY_MITOSIS	REACTOME_FBXL7_DOWN_REGULATES_AURKA_DURING_MITOTIC_ENTRY_AND_IN_EARLY_MITOSIS		42	-0.574403	-1.51376	0.0224719	0.0812438	1	7556	tags=62%, list=21%, signal=78%
REACTOME_MITOCHONDRIAL_TRNA_AMINOACYLATION	REACTOME_MITOCHONDRIAL_TRNA_AMINOACYLATION		21	-0.653537	-1.51349	0.0291829	0.0805755	1	7837	tags=62%, list=22%, signal=79%
REACTOME_IRON_UPTAKE_AND_TRANSPORT	REACTOME_IRON_UPTAKE_AND_TRANSPORT		58	-0.547275	-1.51237	0.00729927	0.0805315	1	5289	tags=38%, list=15%, signal=44%
REACTOME_DUAL_INCISION_IN_GG_NER	REACTOME_DUAL_INCISION_IN_GG_NER		41	-0.578042	-1.51212	0.0110906	0.0798694	1	7851	tags=59%, list=22%, signal=75%
REACTOME_RNA_POLYMERASE_II_TRANSCRIPTION_TERMINATION	REACTOME_RNA_POLYMERASE_II_TRANSCRIPTION_TERMINATION		67	-0.525256	-1.51211	0.00909091	0.0790457	1	3723	tags=37%, list=10%, signal=42%
REACTOME_DIGESTION	REACTOME_DIGESTION		23	-0.652158	-1.50654	0.0314233	0.0820862	1	6185	tags=39%, list=17%, signal=47%
REACTOME_UBIQUITIN_DEPENDENT_DEGRADATION_OF_CYCLIN_D	REACTOME_UBIQUITIN_DEPENDENT_DEGRADATION_OF_CYCLIN_D		39	-0.568409	-1.50144	0.00706714	0.085017	1	7556	tags=67%, list=21%, signal=85%
REACTOME_NEGATIVE_EPIGENETIC_REGULATION_OF_RRNA_EXPRESSION	REACTOME_NEGATIVE_EPIGENETIC_REGULATION_OF_RRNA_EXPRESSION		108	-0.493909	-1.49903	0.00342466	0.0859757	1	7835	tags=49%, list=22%, signal=63%
REACTOME_DEPOSITION_OF_NEW_CENPA_CONTAINING_NUCLEOSOMES_AT_THE_CENTROMERE	REACTOME_DEPOSITION_OF_NEW_CENPA_CONTAINING_NUCLEOSOMES_AT_THE_CENTROMERE		72	-0.512427	-1.49005	0.00525394	0.0922225	1	5962	tags=39%, list=17%, signal=47%
REACTOME_TELOMERE_MAINTENANCE	REACTOME_TELOMERE_MAINTENANCE		112	-0.490605	-1.48846	0.0017301	0.0925571	1	7851	tags=46%, list=22%, signal=59%
REACTOME_THE_ROLE_OF_GTSE1_IN_G2_M_PROGRESSION_AFTER_G2_CHECKPOINT	REACTOME_THE_ROLE_OF_GTSE1_IN_G2_M_PROGRESSION_AFTER_G2_CHECKPOINT		66	-0.523681	-1.48796	0.00340715	0.0920047	1	7556	tags=53%, list=21%, signal=67%
REACTOME_APC_C_CDC20_MEDIATED_DEGRADATION_OF_CYCLIN_B	REACTOME_APC_C_CDC20_MEDIATED_DEGRADATION_OF_CYCLIN_B		24	-0.628623	-1.47752	0.0304659	0.0996895	1	7533	tags=67%, list=21%, signal=84%
REACTOME_TRNA_AMINOACYLATION	REACTOME_TRNA_AMINOACYLATION		42	-0.560113	-1.47436	0.0187394	0.101679	1	8203	tags=57%, list=23%, signal=74%
REACTOME_PEROXISOMAL_PROTEIN_IMPORT	REACTOME_PEROXISOMAL_PROTEIN_IMPORT		63	-0.526789	-1.47433	0.0138169	0.100787	1	7491	tags=49%, list=21%, signal=62%
REACTOME_ANTIGEN_ACTIVATES_B_CELL_RECEPTOR_BCR_LEADING_TO_GENERATION_OF_SECOND_MESSENGERS	REACTOME_ANTIGEN_ACTIVATES_B_CELL_RECEPTOR_BCR_LEADING_TO_GENERATION_OF_SECOND_MESSENGERS		85	-0.496849	-1.47404	0.00163934	0.100156	1	7099	tags=36%, list=20%, signal=45%
REACTOME_CITRIC_ACID_CYCLE_TCA_CYCLE	REACTOME_CITRIC_ACID_CYCLE_TCA_CYCLE		34	-0.58573	-1.47305	0.0189036	0.100147	1	4991	tags=50%, list=14%, signal=58%
REACTOME_SIGNALING_BY_THE_B_CELL_RECEPTOR_BCR	REACTOME_SIGNALING_BY_THE_B_CELL_RECEPTOR_BCR		152	-0.466075	-1.47146	0.00343053	0.100521	1	7568	tags=41%, list=21%, signal=52%
REACTOME_BASE_EXCISION_REPAIR	REACTOME_BASE_EXCISION_REPAIR		90	-0.49563	-1.47077	0.00700525	0.100268	1	8599	tags=50%, list=24%, signal=66%
REACTOME_REGULATION_OF_MITF_M_DEPENDENT_GENES_INVOLVED_IN_LYSOSOME_BIOGENESIS_AND_AUTOPHAGY	REACTOME_REGULATION_OF_MITF_M_DEPENDENT_GENES_INVOLVED_IN_LYSOSOME_BIOGENESIS_AND_AUTOPHAGY		17	-0.680774	-1.46768	0.0497132	0.101972	1	6195	tags=65%, list=17%, signal=78%
REACTOME_RNA_POLYMERASE_III_CHAIN_ELONGATION	REACTOME_RNA_POLYMERASE_III_CHAIN_ELONGATION		18	-0.675747	-1.46166	0.0424779	0.106512	1	1872	tags=44%, list=5%, signal=47%
REACTOME_APC_CDC20_MEDIATED_DEGRADATION_OF_NEK2A	REACTOME_APC_CDC20_MEDIATED_DEGRADATION_OF_NEK2A		26	-0.628201	-1.45771	0.0340502	0.109079	1	7533	tags=65%, list=21%, signal=83%
REACTOME_DEGRADATION_OF_DVL	REACTOME_DEGRADATION_OF_DVL		44	-0.560424	-1.45517	0.0241796	0.110341	1	7556	tags=61%, list=21%, signal=78%
REACTOME_DEGRADATION_OF_CRY_AND_PER_PROTEINS	REACTOME_DEGRADATION_OF_CRY_AND_PER_PROTEINS		48	-0.539841	-1.45448	0.0148423	0.109928	1	7556	tags=56%, list=21%, signal=71%
REACTOME_NUCLEOTIDE_EXCISION_REPAIR	REACTOME_NUCLEOTIDE_EXCISION_REPAIR		108	-0.482073	-1.45419	0.00905797	0.109267	1	8798	tags=56%, list=25%, signal=75%
REACTOME_PENTOSE_PHOSPHATE_PATHWAY	REACTOME_PENTOSE_PHOSPHATE_PATHWAY		15	-0.689326	-1.45348	0.0526316	0.108953	1	7223	tags=67%, list=20%, signal=84%
REACTOME_DEGRADATION_OF_GLI1_BY_THE_PROTEASOME	REACTOME_DEGRADATION_OF_GLI1_BY_THE_PROTEASOME		47	-0.534476	-1.44919	0.0143369	0.112134	1	7556	tags=62%, list=21%, signal=78%
REACTOME_HIV_TRANSCRIPTION_ELONGATION	REACTOME_HIV_TRANSCRIPTION_ELONGATION		43	-0.544406	-1.44901	0.0420475	0.111305	1	5898	tags=42%, list=17%, signal=50%
REACTOME_INHIBITION_OF_DNA_RECOMBINATION_AT_TELOMERE	REACTOME_INHIBITION_OF_DNA_RECOMBINATION_AT_TELOMERE		67	-0.503605	-1.44396	0.0138889	0.114743	1	7228	tags=43%, list=20%, signal=54%
REACTOME_RNA_POLYMERASE_III_TRANSCRIPTION_INITIATION_FROM_TYPE_3_PROMOTER	REACTOME_RNA_POLYMERASE_III_TRANSCRIPTION_INITIATION_FROM_TYPE_3_PROMOTER		28	-0.598651	-1.44367	0.0415913	0.114096	1	1872	tags=36%, list=5%, signal=38%
REACTOME_MRNA_CAPPING	REACTOME_MRNA_CAPPING		29	-0.596866	-1.44339	0.0411215	0.113416	1	7732	tags=59%, list=22%, signal=75%
REACTOME_ANTIMICROBIAL_PEPTIDES	REACTOME_ANTIMICROBIAL_PEPTIDES		91	-0.480316	-1.4367	0.016158	0.118876	1	6318	tags=22%, list=18%, signal=27%
REACTOME_HIV_TRANSCRIPTION_INITIATION	REACTOME_HIV_TRANSCRIPTION_INITIATION		47	-0.530493	-1.43655	0.0269784	0.118005	1	7732	tags=64%, list=22%, signal=81%
REACTOME_RECOGNITION_OF_DNA_DAMAGE_BY_PCNA_CONTAINING_REPLICATION_COMPLEX	REACTOME_RECOGNITION_OF_DNA_DAMAGE_BY_PCNA_CONTAINING_REPLICATION_COMPLEX		30	-0.574617	-1.41473	0.0506567	0.138899	1	7851	tags=60%, list=22%, signal=77%
REACTOME_DECTIN_1_MEDIATED_NONCANONICAL_NF_KB_SIGNALING	REACTOME_DECTIN_1_MEDIATED_NONCANONICAL_NF_KB_SIGNALING		49	-0.53158	-1.41421	0.0335097	0.138365	1	7556	tags=57%, list=21%, signal=72%
REACTOME_RESOLUTION_OF_ABASIC_SITES_AP_SITES	REACTOME_RESOLUTION_OF_ABASIC_SITES_AP_SITES		38	-0.547874	-1.40914	0.0473588	0.142718	1	8835	tags=61%, list=25%, signal=80%
REACTOME_TELOMERE_EXTENSION_BY_TELOMERASE	REACTOME_TELOMERE_EXTENSION_BY_TELOMERASE		23	-0.59859	-1.40345	0.0546448	0.147988	1	8494	tags=74%, list=24%, signal=97%
REACTOME_ACTIVATION_OF_THE_PRE_REPLICATIVE_COMPLEX	REACTOME_ACTIVATION_OF_THE_PRE_REPLICATIVE_COMPLEX		33	-0.560217	-1.40088	0.0436508	0.149684	1	6376	tags=48%, list=18%, signal=59%
REACTOME_ABC_FAMILY_PROTEINS_MEDIATED_TRANSPORT	REACTOME_ABC_FAMILY_PROTEINS_MEDIATED_TRANSPORT		90	-0.47179	-1.39591	0.0215054	0.154194	1	8027	tags=53%, list=23%, signal=69%
REACTOME_DOWNSTREAM_TCR_SIGNALING	REACTOME_DOWNSTREAM_TCR_SIGNALING		86	-0.47107	-1.39041	0.0209059	0.159977	1	7556	tags=50%, list=21%, signal=63%
REACTOME_BASE_EXCISION_REPAIR_AP_SITE_FORMATION	REACTOME_BASE_EXCISION_REPAIR_AP_SITE_FORMATION		62	-0.492452	-1.38414	0.0283019	0.16672	1	8058	tags=45%, list=23%, signal=58%
REACTOME_DIGESTION_AND_ABSORPTION	REACTOME_DIGESTION_AND_ABSORPTION		28	-0.570973	-1.38411	0.0547445	0.165463	1	6185	tags=36%, list=17%, signal=43%
REACTOME_INSULIN_RECEPTOR_RECYCLING	REACTOME_INSULIN_RECEPTOR_RECYCLING		30	-0.562186	-1.38348	0.0625	0.165007	1	5289	tags=50%, list=15%, signal=59%
REACTOME_PIWI_INTERACTING_RNA_PIRNA_BIOGENESIS	REACTOME_PIWI_INTERACTING_RNA_PIRNA_BIOGENESIS		29	-0.56137	-1.38034	0.0601504	0.167563	1	7228	tags=48%, list=20%, signal=61%
REACTOME_AMINO_ACIDS_REGULATE_MTORC1	REACTOME_AMINO_ACIDS_REGULATE_MTORC1		55	-0.500287	-1.37827	0.0464684	0.168962	1	5415	tags=45%, list=15%, signal=54%
REACTOME_S_PHASE	REACTOME_S_PHASE		150	-0.432045	-1.37803	0.0103448	0.168053	1	6822	tags=45%, list=19%, signal=55%
REACTOME_GLOBAL_GENOME_NUCLEOTIDE_EXCISION_REPAIR_GG_NER	REACTOME_GLOBAL_GENOME_NUCLEOTIDE_EXCISION_REPAIR_GG_NER		84	-0.468492	-1.37742	0.0241187	0.167643	1	8738	tags=58%, list=25%, signal=77%
REACTOME_DEGRADATION_OF_CYSTEINE_AND_HOMOCYSTEINE	REACTOME_DEGRADATION_OF_CYSTEINE_AND_HOMOCYSTEINE		15	-0.660818	-1.36686	0.10397	0.180423	1	7600	tags=80%, list=21%, signal=102%
REACTOME_CHOLESTEROL_BIOSYNTHESIS	REACTOME_CHOLESTEROL_BIOSYNTHESIS		27	-0.559466	-1.3634	0.0647619	0.183848	1	9254	tags=70%, list=26%, signal=95%
REACTOME_DEGRADATION_OF_AXIN	REACTOME_DEGRADATION_OF_AXIN		42	-0.517467	-1.36287	0.0538462	0.183305	1	7556	tags=62%, list=21%, signal=78%
REACTOME_KERATAN_SULFATE_DEGRADATION	REACTOME_KERATAN_SULFATE_DEGRADATION		15	-0.658965	-1.36132	0.0897666	0.184095	1	7645	tags=53%, list=21%, signal=68%
REACTOME_SIRT1_NEGATIVELY_REGULATES_RRNA_EXPRESSION	REACTOME_SIRT1_NEGATIVELY_REGULATES_RRNA_EXPRESSION		67	-0.478673	-1.36026	0.034965	0.184241	1	7835	tags=46%, list=22%, signal=59%
REACTOME_G2_M_CHECKPOINTS	REACTOME_G2_M_CHECKPOINTS		156	-0.431073	-1.3599	0.0214521	0.183473	1	8184	tags=47%, list=23%, signal=61%
REACTOME_ACTIVATION_OF_ATR_IN_RESPONSE_TO_REPLICATION_STRESS	REACTOME_ACTIVATION_OF_ATR_IN_RESPONSE_TO_REPLICATION_STRESS		37	-0.521273	-1.35244	0.0535055	0.192669	1	7599	tags=51%, list=21%, signal=65%
REACTOME_MITOCHONDRIAL_CALCIUM_ION_TRANSPORT	REACTOME_MITOCHONDRIAL_CALCIUM_ION_TRANSPORT		23	-0.576847	-1.35154	0.0895795	0.192479	1	6262	tags=57%, list=18%, signal=69%
REACTOME_ASYMMETRIC_LOCALIZATION_OF_PCP_PROTEINS	REACTOME_ASYMMETRIC_LOCALIZATION_OF_PCP_PROTEINS		51	-0.496822	-1.3432	0.0469314	0.203012	1	6794	tags=53%, list=19%, signal=65%
REACTOME_PROCESSING_OF_SMDT1	REACTOME_PROCESSING_OF_SMDT1		16	-0.6358	-1.34282	0.100746	0.202174	1	6262	tags=63%, list=18%, signal=76%
REACTOME_PURINE_CATABOLISM	REACTOME_PURINE_CATABOLISM		17	-0.616901	-1.33626	0.104972	0.210556	1	3264	tags=47%, list=9%, signal=52%
REACTOME_DETOXIFICATION_OF_REACTIVE_OXYGEN_SPECIES	REACTOME_DETOXIFICATION_OF_REACTIVE_OXYGEN_SPECIES		37	-0.514963	-1.32986	0.0843806	0.218888	1	7012	tags=51%, list=20%, signal=64%
REACTOME_ACTIVATION_OF_NF_KAPPAB_IN_B_CELLS	REACTOME_ACTIVATION_OF_NF_KAPPAB_IN_B_CELLS		54	-0.487855	-1.32846	0.0744681	0.219821	1	7556	tags=50%, list=21%, signal=63%
REACTOME_TRNA_PROCESSING_IN_THE_NUCLEUS	REACTOME_TRNA_PROCESSING_IN_THE_NUCLEUS		59	-0.475273	-1.32557	0.0575916	0.223	1	4285	tags=37%, list=12%, signal=42%
REACTOME_RNA_POLYMERASE_I_TRANSCRIPTION	REACTOME_RNA_POLYMERASE_I_TRANSCRIPTION		110	-0.436598	-1.32507	0.0313531	0.22243	1	7835	tags=46%, list=22%, signal=59%
REACTOME_EXTENSION_OF_TELOMERES	REACTOME_EXTENSION_OF_TELOMERES		51	-0.4955	-1.32397	0.0751748	0.222649	1	8714	tags=55%, list=24%, signal=73%
REACTOME_TP53_REGULATES_TRANSCRIPTION_OF_DNA_REPAIR_GENES	REACTOME_TP53_REGULATES_TRANSCRIPTION_OF_DNA_REPAIR_GENES		62	-0.47345	-1.32381	0.0502793	0.221477	1	7732	tags=44%, list=22%, signal=56%
REACTOME_PLASMA_LIPOPROTEIN_ASSEMBLY	REACTOME_PLASMA_LIPOPROTEIN_ASSEMBLY		19	-0.584926	-1.32269	0.0958084	0.221697	1	7160	tags=53%, list=20%, signal=66%
REACTOME_INHIBITION_OF_THE_PROTEOLYTIC_ACTIVITY_OF_APC_C_REQUIRED_FOR_THE_ONSET_OF_ANAPHASE_BY_MITOTIC_SPINDLE_CHECKPOINT_COMPONENTS	REACTOME_INHIBITION_OF_THE_PROTEOLYTIC_ACTIVITY_OF_APC_C_REQUIRED_FOR_THE_ONSET_OF_ANAPHASE_BY_MITOTIC_SPINDLE_CHECKPOINT_COMPONENTS		21	-0.586598	-1.30907	0.0954199	0.241987	1	7533	tags=62%, list=21%, signal=78%
REACTOME_REGULATION_OF_MRNA_STABILITY_BY_PROTEINS_THAT_BIND_AU_RICH_ELEMENTS	REACTOME_REGULATION_OF_MRNA_STABILITY_BY_PROTEINS_THAT_BIND_AU_RICH_ELEMENTS		74	-0.454881	-1.30814	0.0595903	0.242055	1	7556	tags=50%, list=21%, signal=63%
