# Supplementary material for: Vitamin D3 ameliorates R-loop-induced replication stress and chromosomal instability in MED12-mutant uterine fibroids
Source: Research Square preprint supplement (doi:10.21203/rs.3.rs-8031602/v1), 2026-01-13
Supplement: Supplementary file 3 [file 61b40efe0ae1f92bf4784297.xlsx]

## Sheet: Hoja1
	week
mouse	0	1	2	3	4	5	6
CONTROL
1	100	108.571	114.286	119.048	123.81	123.809	123.809
2	100	103.333	108.333	112.5	112.5	112.5	112.5
3	100	108.636	109.091	113.636	122.727	122.727	122.727
4	100	96	100	104	108	96	100
5	100	113.636	118.182	113.636	113.636	118.182	113.636
6	100	117.391	117.391	113.043	121.739	126.087	113.043
7	100	104.762	104.762	109.524	109.524	114.286	109.524
8	100	113.043	113.043	113.043	113.043	117.391	117.391
9	100	113.636	109.091	109.091	113.63	113.63	114
10	100	95	96	96	100	100	108
VD3 0.1
1	100	107.407	111.111	111.111	114.815	111.111	103.704
2	100	104.167	100	104.167	100	95.8333	87.5
3	100	111.111	116.667	127.778	111.111	116.667	116.667
VD3 0.5
1	100	99.0909	104.546	104.546	113.636	104.546	109.091
2	100	101.25	104.167	108.333	104.167	108.333	112.5
3	100	110	113.636	109.091	118.182	113.636	118.182
DCL 0.3
1	100	113.636	113.636	113.636	104.546	81.8182	95.4545
2	100	100	86.9565	95.6522	82.6087	82.6087	86.9565
3	100	104	104	96	96	92	84
4	100	104.546	90.9091	90.9091	86.3636	81.8182	86.3636
Data represented as percentage of body weight/loss from baseline
