# Supplementary material for: Vitamin D3 ameliorates R-loop-induced replication stress and chromosomal instability in MED12-mutant uterine fibroids
Source: Research Square preprint supplement (doi:10.21203/rs.3.rs-8031602/v1), 2026-01-13
Supplement: Supplementary file 4 [file 7e79946507f31b11135e607e.xlsx]

## Sheet: Hoja1
	week
mouse	0	1	2	3	4	5	6
CONTROL
1	21	22.8	24	25	26	26	26
2	24	24.8	26	27	27	27	27
3	22	23.9	24	25	27	27	27
4	25	24	25	26	27	24	25
5	22	25	26	25	25	26	25
6	23	27	27	26	28	29	26
7	21	22	22	23	23	24	23
8	23	26	26	26	26	27	27
9	23	27	27	26	28	29	26
10	21	22	22	23	23	24	23
VD3 0.1
1	27	29	30	30	31	30	30
2	24	25	24	25	24	23	21
3	22	24	25	28	24	25	24
VD3 0.5
1	22	21.8	23	23	25	23	24
2	24	24.3	25	26	25	26	27
3	22	24.2	25	24	26	25	26
DCL 0.3
1	22	25	25	25	23	18	21
2	23	23	20	22	19	19	20
3	25	26	26	24	24	23	21
4	22	23	20	20	19	18	19
