# Supplementary material for: Vitamin D3 ameliorates R-loop-induced replication stress and chromosomal instability in MED12-mutant uterine fibroids
Source: Research Square preprint supplement (doi:10.21203/rs.3.rs-8031602/v1), 2026-01-13
Supplement: Supplementary file 5 [file 965fdfb584eb491c02cad671.xlsx]

## Sheet: Sheet1
NAME	GS.br..follow.link.to.MSigDB	GS.DETAILS	SIZE	ES	NES	NOM.p.val	FDR.q.val	FWER.p.val	RANK.AT.MAX	LEADING.EDGE	X
REACTOME_TRANSLATION	REACTOME_TRANSLATION	Details ...	293	-0.626181	-2.05192	0	0	0	9151	tags=75%, list=26%, signal=100%
REACTOME_SRP_DEPENDENT_COTRANSLATIONAL_PROTEIN_TARGETING_TO_MEMBRANE	REACTOME_SRP_DEPENDENT_COTRANSLATIONAL_PROTEIN_TARGETING_TO_MEMBRANE	Details ...	113	-0.699358	-2.05113	0	0	0	9481	tags=86%, list=27%, signal=117%
REACTOME_SCAVENGING_OF_HEME_FROM_PLASMA	REACTOME_SCAVENGING_OF_HEME_FROM_PLASMA	Details ...	68	-0.732791	-2.03497	0	0.000306223	0.001	4229	tags=40%, list=12%, signal=45%
REACTOME_EUKARYOTIC_TRANSLATION_ELONGATION	REACTOME_EUKARYOTIC_TRANSLATION_ELONGATION	Details ...	94	-0.695551	-1.99785	0	0.000469996	0.002	9481	tags=87%, list=27%, signal=119%
REACTOME_RRNA_PROCESSING	REACTOME_RRNA_PROCESSING	Details ...	203	-0.624655	-1.9629	0	0.00112838	0.006	9159	tags=76%, list=26%, signal=102%
REACTOME_EUKARYOTIC_TRANSLATION_INITIATION	REACTOME_EUKARYOTIC_TRANSLATION_INITIATION	Details ...	120	-0.653654	-1.93986	0	0.00220687	0.014	9229	tags=80%, list=26%, signal=108%
REACTOME_CD22_MEDIATED_BCR_REGULATION	REACTOME_CD22_MEDIATED_BCR_REGULATION	Details ...	60	-0.717131	-1.93392	0	0.00231224	0.017	4229	tags=40%, list=12%, signal=45%
REACTOME_COMPLEX_I_BIOGENESIS	REACTOME_COMPLEX_I_BIOGENESIS	Details ...	68	-0.70011	-1.93152	0	0.00213825	0.018	8674	tags=79%, list=24%, signal=105%
REACTOME_CREATION_OF_C4_AND_C2_ACTIVATORS	REACTOME_CREATION_OF_C4_AND_C2_ACTIVATORS	Details ...	70	-0.690082	-1.90945	0	0.00272719	0.025	4229	tags=33%, list=12%, signal=37%
REACTOME_INITIAL_TRIGGERING_OF_COMPLEMENT	REACTOME_INITIAL_TRIGGERING_OF_COMPLEMENT	Details ...	78	-0.677517	-1.90087	0	0.00302781	0.031	4229	tags=33%, list=12%, signal=38%
REACTOME_MITOCHONDRIAL_TRANSLATION	REACTOME_MITOCHONDRIAL_TRANSLATION	Details ...	94	-0.650568	-1.87214	0	0.00480556	0.053	7387	tags=67%, list=21%, signal=84%
REACTOME_RESPONSE_OF_EIF2AK4_GCN2_TO_AMINO_ACID_DEFICIENCY	REACTOME_RESPONSE_OF_EIF2AK4_GCN2_TO_AMINO_ACID_DEFICIENCY	Details ...	102	-0.62115	-1.81522	0	0.0128663	0.152	9481	tags=82%, list=27%, signal=112%
REACTOME_FCGR_ACTIVATION	REACTOME_FCGR_ACTIVATION	Details ...	68	-0.666763	-1.81082	0	0.0123827	0.159	4229	tags=38%, list=12%, signal=43%
REACTOME_ORC1_REMOVAL_FROM_CHROMATIN	REACTOME_ORC1_REMOVAL_FROM_CHROMATIN	Details ...	58	-0.664879	-1.8072	0	0.01204	0.166	9541	tags=76%, list=27%, signal=103%
REACTOME_RESPIRATORY_ELECTRON_TRANSPORT	REACTOME_RESPIRATORY_ELECTRON_TRANSPORT	Details ...	159	-0.581215	-1.7954	0	0.0144984	0.211	8761	tags=72%, list=25%, signal=95%
REACTOME_INFLUENZA_INFECTION	REACTOME_INFLUENZA_INFECTION	Details ...	157	-0.572293	-1.77668	0	0.0183716	0.263	9514	tags=73%, list=27%, signal=99%
REACTOME_SELENOAMINO_ACID_METABOLISM	REACTOME_SELENOAMINO_ACID_METABOLISM	Details ...	118	-0.587077	-1.76106	0	0.0222863	0.331	9147	tags=75%, list=26%, signal=101%
REACTOME_SYNTHESIS_OF_DNA	REACTOME_SYNTHESIS_OF_DNA	Details ...	108	-0.58938	-1.75104	0	0.0247795	0.367	8627	tags=65%, list=24%, signal=85%
REACTOME_PROTEASOME_ASSEMBLY	REACTOME_PROTEASOME_ASSEMBLY	Details ...	52	-0.65223	-1.72982	0	0.033064	0.469	6349	tags=54%, list=18%, signal=65%
REACTOME_APC_C_MEDIATED_DEGRADATION_OF_CELL_CYCLE_PROTEINS	REACTOME_APC_C_MEDIATED_DEGRADATION_OF_CELL_CYCLE_PROTEINS	Details ...	75	-0.614581	-1.72649	0	0.0331655	0.487	6603	tags=53%, list=19%, signal=65%
REACTOME_ACTIVATION_OF_APC_C_AND_APC_C_CDC20_MEDIATED_DEGRADATION_OF_MITOTIC_PROTEINS	REACTOME_ACTIVATION_OF_APC_C_AND_APC_C_CDC20_MEDIATED_DEGRADATION_OF_MITOTIC_PROTEINS		64	-0.634626	-1.72186	0	0.0337047	0.517	8786	tags=67%, list=25%, signal=89%
REACTOME_SWITCHING_OF_ORIGINS_TO_A_POST_REPLICATIVE_STATE	REACTOME_SWITCHING_OF_ORIGINS_TO_A_POST_REPLICATIVE_STATE		79	-0.606395	-1.72018	0	0.0330347	0.529	8786	tags=63%, list=25%, signal=84%
REACTOME_REGULATION_OF_EXPRESSION_OF_SLITS_AND_ROBOS	REACTOME_REGULATION_OF_EXPRESSION_OF_SLITS_AND_ROBOS		159	-0.556557	-1.7193	0	0.0319705	0.532	9491	tags=74%, list=27%, signal=101%
REACTOME_MITOCHONDRIAL_FATTY_ACID_BETA_OXIDATION	REACTOME_MITOCHONDRIAL_FATTY_ACID_BETA_OXIDATION		37	-0.687049	-1.70767	0	0.0361432	0.584	7494	tags=68%, list=21%, signal=85%
REACTOME_RRNA_MODIFICATION_IN_THE_NUCLEUS_AND_CYTOSOL	REACTOME_RRNA_MODIFICATION_IN_THE_NUCLEUS_AND_CYTOSOL		60	-0.625334	-1.69766	0	0.0397404	0.631	8902	tags=68%, list=25%, signal=91%
REACTOME_SARS_COV_2_MODULATES_HOST_TRANSLATION_MACHINERY	REACTOME_SARS_COV_2_MODULATES_HOST_TRANSLATION_MACHINERY		50	-0.652142	-1.69105	0.00226244	0.0419084	0.667	9229	tags=84%, list=26%, signal=113%
REACTOME_ROLE_OF_PHOSPHOLIPIDS_IN_PHAGOCYTOSIS	REACTOME_ROLE_OF_PHOSPHOLIPIDS_IN_PHAGOCYTOSIS		81	-0.589654	-1.66841	0	0.0540169	0.772	4229	tags=33%, list=12%, signal=38%
REACTOME_SARS_COV_1_MODULATES_HOST_TRANSLATION_MACHINERY	REACTOME_SARS_COV_1_MODULATES_HOST_TRANSLATION_MACHINERY		37	-0.678046	-1.66593	0.00214133	0.0540718	0.787	9229	tags=86%, list=26%, signal=117%
REACTOME_AEROBIC_RESPIRATION_AND_RESPIRATORY_ELECTRON_TRANSPORT	REACTOME_AEROBIC_RESPIRATION_AND_RESPIRATORY_ELECTRON_TRANSPORT		261	-0.505858	-1.64123	0	0.0720765	0.891	8831	tags=64%, list=25%, signal=84%
REACTOME_MRNA_SPLICING	REACTOME_MRNA_SPLICING		212	-0.515709	-1.64111	0	0.0697385	0.892	9064	tags=58%, list=25%, signal=77%
REACTOME_CRISTAE_FORMATION	REACTOME_CRISTAE_FORMATION		33	-0.683726	-1.63908	0.00821355	0.0690436	0.897	8023	tags=76%, list=23%, signal=98%
REACTOME_ANTIGEN_ACTIVATES_B_CELL_RECEPTOR_BCR_LEADING_TO_GENERATION_OF_SECOND_MESSENGERS	REACTOME_ANTIGEN_ACTIVATES_B_CELL_RECEPTOR_BCR_LEADING_TO_GENERATION_OF_SECOND_MESSENGERS		85	-0.5649	-1.63326	0	0.0727393	0.913	4229	tags=33%, list=12%, signal=37%
REACTOME_VIF_MEDIATED_DEGRADATION_OF_APOBEC3G	REACTOME_VIF_MEDIATED_DEGRADATION_OF_APOBEC3G		41	-0.652962	-1.63163	0.00881057	0.071795	0.917	9541	tags=78%, list=27%, signal=106%
REACTOME_ACTIVATION_OF_THE_MRNA_UPON_BINDING_OF_THE_CAP_BINDING_COMPLEX_AND_EIFS_AND_SUBSEQUENT_BINDING_TO_43S	REACTOME_ACTIVATION_OF_THE_MRNA_UPON_BINDING_OF_THE_CAP_BINDING_COMPLEX_AND_EIFS_AND_SUBSEQUENT_BINDING_TO_43S		60	-0.594416	-1.61715	0.00663717	0.0814196	0.947	9229	tags=75%, list=26%, signal=101%
REACTOME_ANTIGEN_PROCESSING_UB_ATP_INDEPENDENT_PROTEASOMAL_DEGRADATION	REACTOME_ANTIGEN_PROCESSING_UB_ATP_INDEPENDENT_PROTEASOMAL_DEGRADATION		19	-0.734921	-1.61254	0.0150538	0.0835562	0.958	8627	tags=84%, list=24%, signal=111%
REACTOME_MITOCHONDRIAL_PROTEIN_DEGRADATION	REACTOME_MITOCHONDRIAL_PROTEIN_DEGRADATION		98	-0.553203	-1.61145	0	0.0824463	0.958	7227	tags=46%, list=20%, signal=57%
REACTOME_CDK_MEDIATED_PHOSPHORYLATION_AND_REMOVAL_OF_CDC6	REACTOME_CDK_MEDIATED_PHOSPHORYLATION_AND_REMOVAL_OF_CDC6		60	-0.591996	-1.60644	0.00217865	0.0845098	0.965	8786	tags=63%, list=25%, signal=84%
REACTOME_APC_C_CDH1_MEDIATED_DEGRADATION_OF_CDC20_AND_OTHER_APC_C_CDH1_TARGETED_PROTEINS_IN_LATE_MITOSIS_EARLY_G1	REACTOME_APC_C_CDH1_MEDIATED_DEGRADATION_OF_CDC20_AND_OTHER_APC_C_CDH1_TARGETED_PROTEINS_IN_LATE_MITOSIS_EARLY_G1		61	-0.577254	-1.59935	0.00234742	0.089084	0.973	8786	tags=64%, list=25%, signal=85%
REACTOME_DUAL_INCISION_IN_TC_NER	REACTOME_DUAL_INCISION_IN_TC_NER		63	-0.589547	-1.59724	0	0.0890545	0.975	7837	tags=57%, list=22%, signal=73%
REACTOME_BINDING_AND_UPTAKE_OF_LIGANDS_BY_SCAVENGER_RECEPTORS	REACTOME_BINDING_AND_UPTAKE_OF_LIGANDS_BY_SCAVENGER_RECEPTORS		97	-0.544496	-1.59335	0.00227273	0.0907658	0.977	4229	tags=33%, list=12%, signal=37%
REACTOME_FORMATION_OF_ATP_BY_CHEMIOSMOTIC_COUPLING	REACTOME_FORMATION_OF_ATP_BY_CHEMIOSMOTIC_COUPLING		20	-0.734025	-1.5928	0.0100402	0.0889233	0.977	8023	tags=85%, list=23%, signal=110%
REACTOME_SCF_SKP2_MEDIATED_DEGRADATION_OF_P27_P21	REACTOME_SCF_SKP2_MEDIATED_DEGRADATION_OF_P27_P21		50	-0.60002	-1.58594	0	0.0930107	0.98	9541	tags=76%, list=27%, signal=104%
REACTOME_PROCESSING_OF_CAPPED_INTRON_CONTAINING_PRE_MRNA	REACTOME_PROCESSING_OF_CAPPED_INTRON_CONTAINING_PRE_MRNA		283	-0.483526	-1.58391	0	0.0927636	0.982	9064	tags=54%, list=25%, signal=72%
REACTOME_CROSS_PRESENTATION_OF_SOLUBLE_EXOGENOUS_ANTIGENS_ENDOSOMES	REACTOME_CROSS_PRESENTATION_OF_SOLUBLE_EXOGENOUS_ANTIGENS_ENDOSOMES		42	-0.623722	-1.57985	0.00665188	0.094819	0.987	6349	tags=52%, list=18%, signal=64%
REACTOME_MRNA_SPLICING_MINOR_PATHWAY	REACTOME_MRNA_SPLICING_MINOR_PATHWAY		50	-0.597581	-1.57754	0.0021692	0.0952053	0.988	8189	tags=62%, list=23%, signal=80%
REACTOME_ROLE_OF_LAT2_NTAL_LAB_ON_CALCIUM_MOBILIZATION	REACTOME_ROLE_OF_LAT2_NTAL_LAB_ON_CALCIUM_MOBILIZATION		70	-0.565464	-1.5744	0	0.096361	0.989	4229	tags=31%, list=12%, signal=36%
REACTOME_TRNA_PROCESSING	REACTOME_TRNA_PROCESSING		110	-0.528769	-1.57208	0	0.0966571	0.989	6728	tags=50%, list=19%, signal=61%
REACTOME_STABILIZATION_OF_P53	REACTOME_STABILIZATION_OF_P53		44	-0.603648	-1.56702	0.0112613	0.100039	0.991	8786	tags=61%, list=25%, signal=81%
REACTOME_TRANSCRIPTION_COUPLED_NUCLEOTIDE_EXCISION_REPAIR_TC_NER	REACTOME_TRANSCRIPTION_COUPLED_NUCLEOTIDE_EXCISION_REPAIR_TC_NER		76	-0.551692	-1.56619	0.00223214	0.0988002	0.991	8544	tags=61%, list=24%, signal=79%
REACTOME_S_PHASE	REACTOME_S_PHASE		150	-0.506322	-1.56119	0	0.101799	0.995	8627	tags=58%, list=24%, signal=76%
REACTOME_CYTOSOLIC_TRNA_AMINOACYLATION	REACTOME_CYTOSOLIC_TRNA_AMINOACYLATION		24	-0.687934	-1.55781	0.0328947	0.102721	0.996	7555	tags=67%, list=21%, signal=85%
REACTOME_MRNA_DECAY_BY_3_TO_5_EXORIBONUCLEASE	REACTOME_MRNA_DECAY_BY_3_TO_5_EXORIBONUCLEASE		16	-0.755305	-1.55539	0.026694	0.102782	0.996	4723	tags=69%, list=13%, signal=79%
REACTOME_GLYCOGEN_BREAKDOWN_GLYCOGENOLYSIS	REACTOME_GLYCOGEN_BREAKDOWN_GLYCOGENOLYSIS		15	-0.766595	-1.5526	0.0195652	0.103553	0.996	6489	tags=73%, list=18%, signal=90%
REACTOME_SCF_BETA_TRCP_MEDIATED_DEGRADATION_OF_EMI1	REACTOME_SCF_BETA_TRCP_MEDIATED_DEGRADATION_OF_EMI1		42	-0.600982	-1.54841	0.00660793	0.106156	0.997	6603	tags=50%, list=19%, signal=61%
REACTOME_MITOCHONDRIAL_PROTEIN_IMPORT	REACTOME_MITOCHONDRIAL_PROTEIN_IMPORT		65	-0.563792	-1.54683	0	0.105764	0.997	9613	tags=66%, list=27%, signal=90%
REACTOME_FCGR3A_MEDIATED_IL10_SYNTHESIS	REACTOME_FCGR3A_MEDIATED_IL10_SYNTHESIS		94	-0.540748	-1.5385	0.00689655	0.112477	0.999	4229	tags=31%, list=12%, signal=35%
REACTOME_UBIQUITIN_DEPENDENT_DEGRADATION_OF_CYCLIN_D	REACTOME_UBIQUITIN_DEPENDENT_DEGRADATION_OF_CYCLIN_D		39	-0.61022	-1.52875	0.00923787	0.120857	0.999	9541	tags=72%, list=27%, signal=98%
REACTOME_DUAL_INCISION_IN_GG_NER	REACTOME_DUAL_INCISION_IN_GG_NER		41	-0.600957	-1.5269	0.0125261	0.120979	0.999	7567	tags=56%, list=21%, signal=71%
REACTOME_PROTEIN_LOCALIZATION	REACTOME_PROTEIN_LOCALIZATION		164	-0.487068	-1.52408	0	0.122198	1	8254	tags=49%, list=23%, signal=64%
REACTOME_AUF1_HNRNP_D0_BINDS_AND_DESTABILIZES_MRNA	REACTOME_AUF1_HNRNP_D0_BINDS_AND_DESTABILIZES_MRNA		42	-0.601423	-1.51644	0.0223214	0.129653	1	9541	tags=74%, list=27%, signal=101%
REACTOME_PROTEIN_METHYLATION	REACTOME_PROTEIN_METHYLATION		17	-0.713304	-1.51388	0.0447154	0.130607	1	7757	tags=82%, list=22%, signal=105%
REACTOME_TRNA_AMINOACYLATION	REACTOME_TRNA_AMINOACYLATION		42	-0.596181	-1.51358	0.0197802	0.128744	1	8253	tags=64%, list=23%, signal=84%
REACTOME_NONSENSE_MEDIATED_DECAY_NMD	REACTOME_NONSENSE_MEDIATED_DECAY_NMD		116	-0.502487	-1.50773	0.00222717	0.133401	1	9229	tags=72%, list=26%, signal=96%
REACTOME_G1_S_SPECIFIC_TRANSCRIPTION	REACTOME_G1_S_SPECIFIC_TRANSCRIPTION		29	-0.640978	-1.50038	0.0149573	0.139513	1	8182	tags=62%, list=23%, signal=81%
REACTOME_FORMATION_OF_TC_NER_PRE_INCISION_COMPLEX	REACTOME_FORMATION_OF_TC_NER_PRE_INCISION_COMPLEX		51	-0.560651	-1.49296	0.00847458	0.145809	1	9489	tags=67%, list=27%, signal=91%
REACTOME_HDR_THROUGH_HOMOLOGOUS_RECOMBINATION_HRR	REACTOME_HDR_THROUGH_HOMOLOGOUS_RECOMBINATION_HRR		70	-0.539333	-1.48941	0.00849257	0.147807	1	7382	tags=56%, list=21%, signal=70%
REACTOME_G0_AND_EARLY_G1	REACTOME_G0_AND_EARLY_G1		27	-0.642792	-1.48738	0.0226804	0.148398	1	8182	tags=67%, list=23%, signal=86%
REACTOME_NEGATIVE_REGULATION_OF_NOTCH4_SIGNALING	REACTOME_NEGATIVE_REGULATION_OF_NOTCH4_SIGNALING		44	-0.582831	-1.48385	0.0106383	0.150759	1	9541	tags=70%, list=27%, signal=96%
REACTOME_ACTIVATION_OF_ATR_IN_RESPONSE_TO_REPLICATION_STRESS	REACTOME_ACTIVATION_OF_ATR_IN_RESPONSE_TO_REPLICATION_STRESS		37	-0.595874	-1.48147	0.0276498	0.151622	1	8474	tags=68%, list=24%, signal=89%
REACTOME_RESOLUTION_OF_ABASIC_SITES_AP_SITES	REACTOME_RESOLUTION_OF_ABASIC_SITES_AP_SITES		38	-0.580686	-1.47542	0.00852879	0.156848	1	7382	tags=61%, list=21%, signal=76%
REACTOME_REGULATION_OF_ORNITHINE_DECARBOXYLASE_ODC	REACTOME_REGULATION_OF_ORNITHINE_DECARBOXYLASE_ODC		38	-0.587661	-1.46737	0.0246085	0.165044	1	8786	tags=63%, list=25%, signal=84%
REACTOME_FBXL7_DOWN_REGULATES_AURKA_DURING_MITOTIC_ENTRY_AND_IN_EARLY_MITOSIS	REACTOME_FBXL7_DOWN_REGULATES_AURKA_DURING_MITOTIC_ENTRY_AND_IN_EARLY_MITOSIS		42	-0.593717	-1.4649	0.0155902	0.166518	1	9541	tags=74%, list=27%, signal=101%
REACTOME_POLYMERASE_SWITCHING_ON_THE_C_STRAND_OF_THE_TELOMERE	REACTOME_POLYMERASE_SWITCHING_ON_THE_C_STRAND_OF_THE_TELOMERE		26	-0.63099	-1.46435	0.0375276	0.164999	1	5344	tags=46%, list=15%, signal=54%
REACTOME_GAP_FILLING_DNA_REPAIR_SYNTHESIS_AND_LIGATION_IN_GG_NER	REACTOME_GAP_FILLING_DNA_REPAIR_SYNTHESIS_AND_LIGATION_IN_GG_NER		25	-0.636622	-1.46325	0.0360721	0.164225	1	7382	tags=72%, list=21%, signal=91%
REACTOME_FCERI_MEDIATED_NF_KB_ACTIVATION	REACTOME_FCERI_MEDIATED_NF_KB_ACTIVATION		122	-0.484463	-1.45731	0.00226757	0.170303	1	6608	tags=35%, list=19%, signal=43%
REACTOME_RECOGNITION_OF_DNA_DAMAGE_BY_PCNA_CONTAINING_REPLICATION_COMPLEX	REACTOME_RECOGNITION_OF_DNA_DAMAGE_BY_PCNA_CONTAINING_REPLICATION_COMPLEX		30	-0.601109	-1.45675	0.0350515	0.168961	1	7567	tags=63%, list=21%, signal=80%
REACTOME_HH_MUTANTS_ABROGATE_LIGAND_SECRETION	REACTOME_HH_MUTANTS_ABROGATE_LIGAND_SECRETION		46	-0.566354	-1.45587	0.0107991	0.168013	1	8786	tags=59%, list=25%, signal=78%
REACTOME_RESOLUTION_OF_D_LOOP_STRUCTURES_THROUGH_SYNTHESIS_DEPENDENT_STRAND_ANNEALING_SDSA	REACTOME_RESOLUTION_OF_D_LOOP_STRUCTURES_THROUGH_SYNTHESIS_DEPENDENT_STRAND_ANNEALING_SDSA		27	-0.618065	-1.4551	0.0416667	0.167017	1	6737	tags=67%, list=19%, signal=82%
REACTOME_REGULATION_OF_APOPTOSIS	REACTOME_REGULATION_OF_APOPTOSIS		40	-0.569945	-1.45466	0.027897	0.16542	1	6603	tags=48%, list=19%, signal=58%
REACTOME_FCERI_MEDIATED_CA_2_MOBILIZATION	REACTOME_FCERI_MEDIATED_CA_2_MOBILIZATION		85	-0.507294	-1.44541	0.00888889	0.176122	1	4229	tags=29%, list=12%, signal=33%
REACTOME_G1_S_DNA_DAMAGE_CHECKPOINTS	REACTOME_G1_S_DNA_DAMAGE_CHECKPOINTS		55	-0.532787	-1.44367	0.0211864	0.176479	1	9541	tags=73%, list=27%, signal=99%
REACTOME_HOMOLOGY_DIRECTED_REPAIR	REACTOME_HOMOLOGY_DIRECTED_REPAIR		140	-0.464801	-1.43712	0.00221239	0.183935	1	7482	tags=48%, list=21%, signal=60%
REACTOME_PURINE_CATABOLISM	REACTOME_PURINE_CATABOLISM		17	-0.677917	-1.43695	0.0391753	0.182052	1	6961	tags=71%, list=20%, signal=88%
REACTOME_CELL_CYCLE_CHECKPOINTS	REACTOME_CELL_CYCLE_CHECKPOINTS		278	-0.436689	-1.42635	0	0.19554	1	7746	tags=46%, list=22%, signal=58%
REACTOME_G2_M_CHECKPOINTS	REACTOME_G2_M_CHECKPOINTS		156	-0.456514	-1.42103	0.00235294	0.200826	1	7692	tags=47%, list=22%, signal=60%
REACTOME_SIGNALING_BY_ROBO_RECEPTORS	REACTOME_SIGNALING_BY_ROBO_RECEPTORS		205	-0.449859	-1.4205	0	0.199443	1	9147	tags=63%, list=26%, signal=84%
REACTOME_TRNA_PROCESSING_IN_THE_NUCLEUS	REACTOME_TRNA_PROCESSING_IN_THE_NUCLEUS		59	-0.521695	-1.41832	0.025463	0.200413	1	8795	tags=58%, list=25%, signal=76%
REACTOME_MITOTIC_METAPHASE_AND_ANAPHASE	REACTOME_MITOTIC_METAPHASE_AND_ANAPHASE		223	-0.442116	-1.41529	0	0.202921	1	6804	tags=41%, list=19%, signal=50%
REACTOME_EXTENSION_OF_TELOMERES	REACTOME_EXTENSION_OF_TELOMERES		51	-0.538271	-1.41259	0.0266393	0.205001	1	7382	tags=55%, list=21%, signal=69%
REACTOME_SEPARATION_OF_SISTER_CHROMATIDS	REACTOME_SEPARATION_OF_SISTER_CHROMATIDS		178	-0.452519	-1.41208	0.00746269	0.203549	1	6695	tags=41%, list=19%, signal=50%
REACTOME_COMPLEMENT_CASCADE	REACTOME_COMPLEMENT_CASCADE		113	-0.471902	-1.40766	0.0136364	0.207971	1	4229	tags=28%, list=12%, signal=32%
REACTOME_CELLULAR_RESPONSE_TO_STARVATION	REACTOME_CELLULAR_RESPONSE_TO_STARVATION		157	-0.452817	-1.4043	0.0134831	0.211133	1	9229	tags=65%, list=26%, signal=87%
REACTOME_HOMOLOGOUS_DNA_PAIRING_AND_STRAND_EXCHANGE	REACTOME_HOMOLOGOUS_DNA_PAIRING_AND_STRAND_EXCHANGE		43	-0.544786	-1.40425	0.035343	0.208974	1	7352	tags=63%, list=21%, signal=79%
REACTOME_DNA_STRAND_ELONGATION	REACTOME_DNA_STRAND_ELONGATION		32	-0.576959	-1.40176	0.0390456	0.210709	1	7616	tags=66%, list=21%, signal=83%
REACTOME_DISEASES_OF_DNA_REPAIR	REACTOME_DISEASES_OF_DNA_REPAIR		51	-0.536192	-1.40114	0.0386266	0.209545	1	7475	tags=63%, list=21%, signal=79%
REACTOME_GLUTATHIONE_CONJUGATION	REACTOME_GLUTATHIONE_CONJUGATION		35	-0.569394	-1.39658	0.0518359	0.214486	1	5475	tags=54%, list=15%, signal=64%
REACTOME_ACTIVATION_OF_THE_PRE_REPLICATIVE_COMPLEX	REACTOME_ACTIVATION_OF_THE_PRE_REPLICATIVE_COMPLEX		33	-0.586577	-1.3959	0.0334728	0.21333	1	8474	tags=70%, list=24%, signal=91%
REACTOME_COLLAGEN_BIOSYNTHESIS_AND_MODIFYING_ENZYMES	REACTOME_COLLAGEN_BIOSYNTHESIS_AND_MODIFYING_ENZYMES		67	-0.506107	-1.39289	0.0263158	0.216092	1	4801	tags=45%, list=13%, signal=52%
REACTOME_MITOTIC_G1_PHASE_AND_G1_S_TRANSITION	REACTOME_MITOTIC_G1_PHASE_AND_G1_S_TRANSITION		139	-0.455684	-1.38727	0.00985222	0.222584	1	6612	tags=42%, list=19%, signal=52%
REACTOME_APC_CDC20_MEDIATED_DEGRADATION_OF_NEK2A	REACTOME_APC_CDC20_MEDIATED_DEGRADATION_OF_NEK2A		26	-0.596059	-1.38623	0.0549683	0.222022	1	8617	tags=65%, list=24%, signal=86%
REACTOME_FORMATION_OF_INCISION_COMPLEX_IN_GG_NER	REACTOME_FORMATION_OF_INCISION_COMPLEX_IN_GG_NER		43	-0.540022	-1.38348	0.0352423	0.224401	1	9229	tags=58%, list=26%, signal=78%
REACTOME_CYCLIN_A_CDK2_ASSOCIATED_EVENTS_AT_S_PHASE_ENTRY	REACTOME_CYCLIN_A_CDK2_ASSOCIATED_EVENTS_AT_S_PHASE_ENTRY		75	-0.48718	-1.38185	0.0227273	0.224942	1	6603	tags=43%, list=19%, signal=52%
REACTOME_TRNA_MODIFICATION_IN_THE_NUCLEUS_AND_CYTOSOL	REACTOME_TRNA_MODIFICATION_IN_THE_NUCLEUS_AND_CYTOSOL		44	-0.543892	-1.38147	0.0451613	0.223376	1	7362	tags=61%, list=21%, signal=77%
REACTOME_PROTEIN_HYDROXYLATION	REACTOME_PROTEIN_HYDROXYLATION		20	-0.624386	-1.36798	0.0935551	0.24416	1	8746	tags=75%, list=25%, signal=99%
