# Supplementary material for: Vitamin D3 ameliorates R-loop-induced replication stress and chromosomal instability in MED12-mutant uterine fibroids
Source: Research Square preprint supplement (doi:10.21203/rs.3.rs-8031602/v1), 2026-01-13
Supplement: Supplementary file 6 [file a682a1ac5ba2f37954ddb81f.xlsx]

## Sheet: Sup Table
The volume is expressed in cubic millimeters and was calculated with the use of the formula: length x width x depth x 0.52
	week 0					week 6							week 0					week 6
CONTROL (VD3 0.1)	length (mm)	width (mm)	depth (mm)	volume	TOTAL volume	length (mm)	width (mm)	depth (mm)	volume	TOTAL volume		VD3 0.1	length (mm)	width (mm)	depth (mm)	volume	TOTAL volume	length (mm)	width (mm)	depth (mm)	volume	TOTAL volume
1.1	6.12	5	2.06	32.7787	62.0307	7.73	3.76	2.35	35.5172	106.176		3.1	6.2	5.2	1.5	25.1472	51.4592	11.41	7.25	3.24	69.6854	69.6854	In this mouse the two fragments joined
1.2	6.03	4.91	1.9	29.252		9.46	6.01	2.39	70.6589			3.2	5	4.6	2.2	26.312
2.1	5.1	5.17	1.75	23.994	43.4353	4.21	5.22	2.19	25.0265	51.741		1.1	5.01	5.04	1.88	24.6848	49.2615	4.85	5.01	1.63	20.5954	44.9857
2.2	4.47	4.92	1.7	19.4413		5.42	5.71	1.66	26.7145			1.2	5.05	4.9	1.91	24.5767		4.77	4.03	2.44	24.3903
3.1	5.17	5	1.8	24.1956	42.1585	5.97	3.96	2.85	35.0363	74.98		3.1	4.6	5.3	1.8	22.8197	41.1653	3.56	5.4	2.26	22.592	38.7101
3.2	5.08	4.25	1.6	17.9629		4.92	5.74	2.72	39.9438			3.2	4.9	4.8	1.5	18.3456		3.98	5.9	1.32	16.118
	week 0					week 6							week 0					week 6
CONTROL (VD3 0.5)	length (mm)	width (mm)	depth (mm)	volume	TOTAL volume	length (mm)	width (mm)	depth (mm)	volume	TOTAL volume		VD3 0.5	length (mm)	width (mm)	depth (mm)	volume	TOTAL volume	length (mm)	width (mm)	depth (mm)	volume	TOTAL volume
4.1	4.57	4.59	1.49	16.2524	37.1556	5.88	4.23	2.08	26.902	66.9724		1.1	5.1	4.67	1.85	22.912	47.8752	3.44	4.14	2.03	15.0334	25.5779
4.2	4.46	4.67	1.93	20.9032		5.37	4.57	3.14	40.0704			1.2	5.37	3.87	2.31	24.9632		3.74	3.41	1.59	10.5445
5.1	5.03	4.85	1.12	14.2079	38.4115	7.09	5.86	2.52	54.4437	182.898		2.1	5.44	4.71	1.79	23.8493	45.0423	3.06	2.89	1.7	7.81757	17.6023
5.2	4.78	4.75	2.05	24.2035		9.74	6.01	4.22	128.454			2.2	5.06	4.45	1.81	21.193		4.23	3.37	1.32	9.7847
6.1	4.54	4.32	1.83	18.6635	36.6825	6.09	4.53	2.89	41.4588	80.4911		3.1	5.7	5.28	1.53	23.9444	42.0351	9.24	4.62	3.1	68.8143	113.766
6.2	4.5	4.14	1.86	18.0189		2.36	5.7	5.58	39.0323			3.2	5.27	4.89	1.35	18.0908		6.14	5.7	2.47	44.9514
	week 0					week 6							week 0					week 6
CONTROL (DCL3)	length (mm)	width (mm)	depth (mm)	volume	TOTAL volume	length (mm)	width (mm)	depth (mm)	volume	TOTAL volume		DCL 0.3	length (mm)	width (mm)	depth (mm)	volume	TOTAL volume	length (mm)	width (mm)	depth (mm)	volume	TOTAL volume
7.1	5.25	4.85	1.9	25.1569	56.128	3.42	2.5	1.32	5.86872	21.6562		1.1	5.05	4.74	1.93	24.0232	55.2991	5.21	1.42	2.12	8.15578	17.8245
7.2	5.15	5.14	2.25	30.9711		3.34	4.5	2.02	15.7875			1.2	5.8	4.25	2.44	31.2759		4.68	2.9	1.37	9.66869
8.1	4.49	5.04	2.1	24.7115	47.5862	3.93	3.12	2.78	17.7254	35.0797		2.1	5.09	4.79	2.14	27.1313	46.9838	4.56	4.23	1.6	16.0483	24.9912
8.2	4.9	4.75	1.89	22.8747		3.91	3.97	2.15	17.3544			2.2	5.25	5.05	1.44	19.8526		3.73	4.23	1.09	8.94291
9.1	5.03	4.93	2.02	26.0477	61.4458	6.08	4.8	3.07	46.5893	77.0357		3.1	5.84	5.36	2.2	35.8099	64.7391	5.11	4.57	2.48	30.1156	43.7394
9.2	5.3	5.2	2.47	35.3981		4.61	4.32	2.94	30.4464			3.2	5.48	5.4	1.88	28.9291		4.37	3.59	1.67	13.6237
10.1	5.46	5.26	2.09	31.2125	55.4692	5.41	4.31	2.7	32.7372	62.3835		4.1	5.35	5.28	2.16	31.7282	67.3366	3.86	3.37	1.3	8.79354	14.897
10.2	5.7	4.93	1.66	24.2568		5.54	4.1	2.51	29.6463			4.2	5.58	5.2	2.36	35.6084		4.18	2.34	1.2	6.10347
